# Supplementary material for: Biochar as Influenced by Feedstock Variability: Implications and Opportunities for Phosphorus Management
Source: Frontiers journal article supplement (doi:10.3389/fsufs.2020.510982), 2020-09-18
Supplement: Data_Sheet_1.docx [file Data_Sheet_1.docx]

**
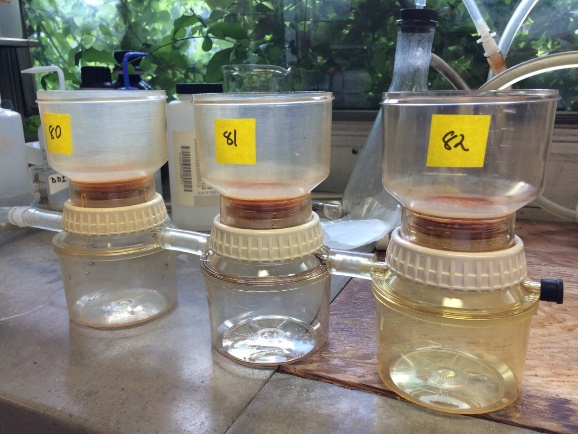
**

**Supplementary Figure 1.** The filtering unit used in the P leaching studies. All experiments were conducted in triplicates.

**Supplementary Figure 2.** X-ray diffraction pattern of a maple biochar sample. Calcite= CaCO3; Quartz= SiO2

**Supplementary Figure 3.**  X-ray diffraction pattern of a hardwood biochar sample. Sylvite = KCl

**Supplementary Figure 4** X-ray diffraction pattern of a pine biochar sample.
